# Supplementary material for: Hilltop curvature as a proxy for erosion rate: Wavelets enable rapid computation and reveal systematic underestimation
Source: Copernicus journal article supplement (doi:10.5194/esurf-2021-40), 2021-05-25
Supplement: Supplementary file 1 [file esurf-2021-40-supplement.pdf]

Supplemental Information for

**Hilltop curvature as a proxy for erosion rate: Wavelets enable rapid computation and reveal systematic underestimation**

William T. Struble<sup>1,2</sup>, Joshua J. Roering<sup>2</sup>

<sup>1</sup>Department of Geosciences, University of Arizona, Tucson, Arizona, USA

<sup>2</sup>Department of Earth Sciences, University of Oregon, Eugene, Oregon, USA

Contents of this file:

Figures S1-S10

The supplemental figures in this file include: 1)  $C_{HT}$  and erosion rate estimations for all mapped hilltops at Hadsall Creek, North Fork Smith River, and Bear Creek (companion figure to Fig. 5); 2) Visualization of synthetic hillslopes with white noise added (companion figure to Fig. 7, 8); 3) Hilltop curvature measurements for  $\sigma=0.5\%L_H$  case for range of  $E^*$ ; 4) Standard deviation of  $C_{HT}$  for  $\sigma=0.5\%L_H$  case for range of  $E^*$ ; 5-7) Ratio of  $C_{HT}$ ,  $C_{HT}$ , and standard deviation of  $C_{HT}$  for  $\sigma=0.1\%L_H$  case for range of  $E^*$ ; 8-10) Ratio of  $C_{HT}$ ,  $C_{HT}$ , and standard deviation of  $C_{HT}$  for  $\sigma=5\%L_H$  case for range of  $E^*$ .

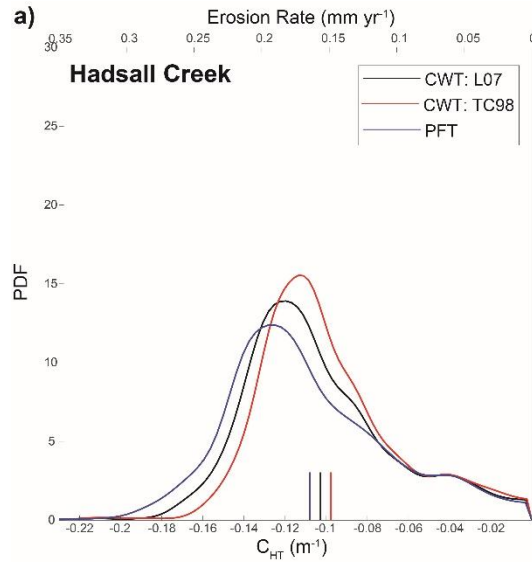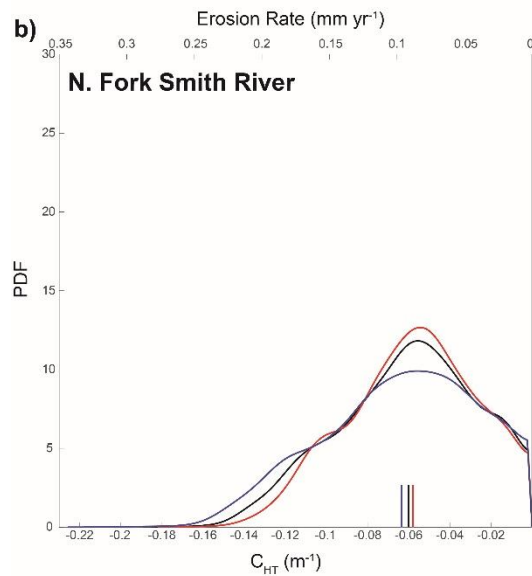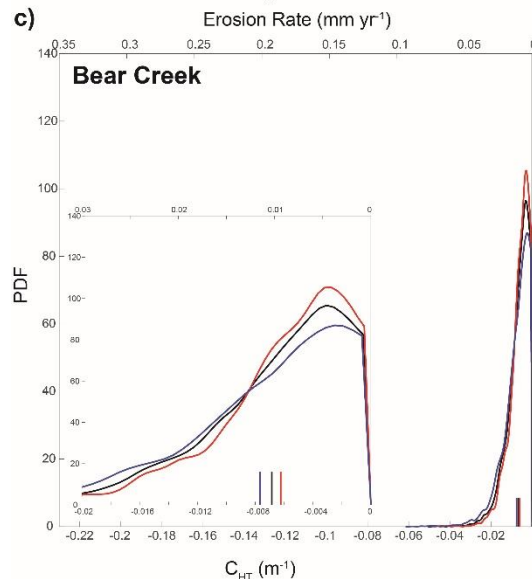

**Figure S1: Probability density functions of  $C_{HT-P}$  and  $C_{HT-W}$  and erosion rate calculated using Equation 1 for all mapped hilltops at each OCR field site. See Figure 5 for representative hilltop PDFs for each catchment. Note agreement between each  $C_{HT}$  measurement technique. Further, note dramatic variability in  $C_{HT}$  between all site (all panels use same x-axis; inset in panel C more clearly displays distribution of  $C_{HT}$  at Bear Creek). Small vertical lines at bottom of each panel represent the mean of the plotted distribution (Table 2). Note that positive  $C_{HT}$  values are not permitted in the output PDF.**

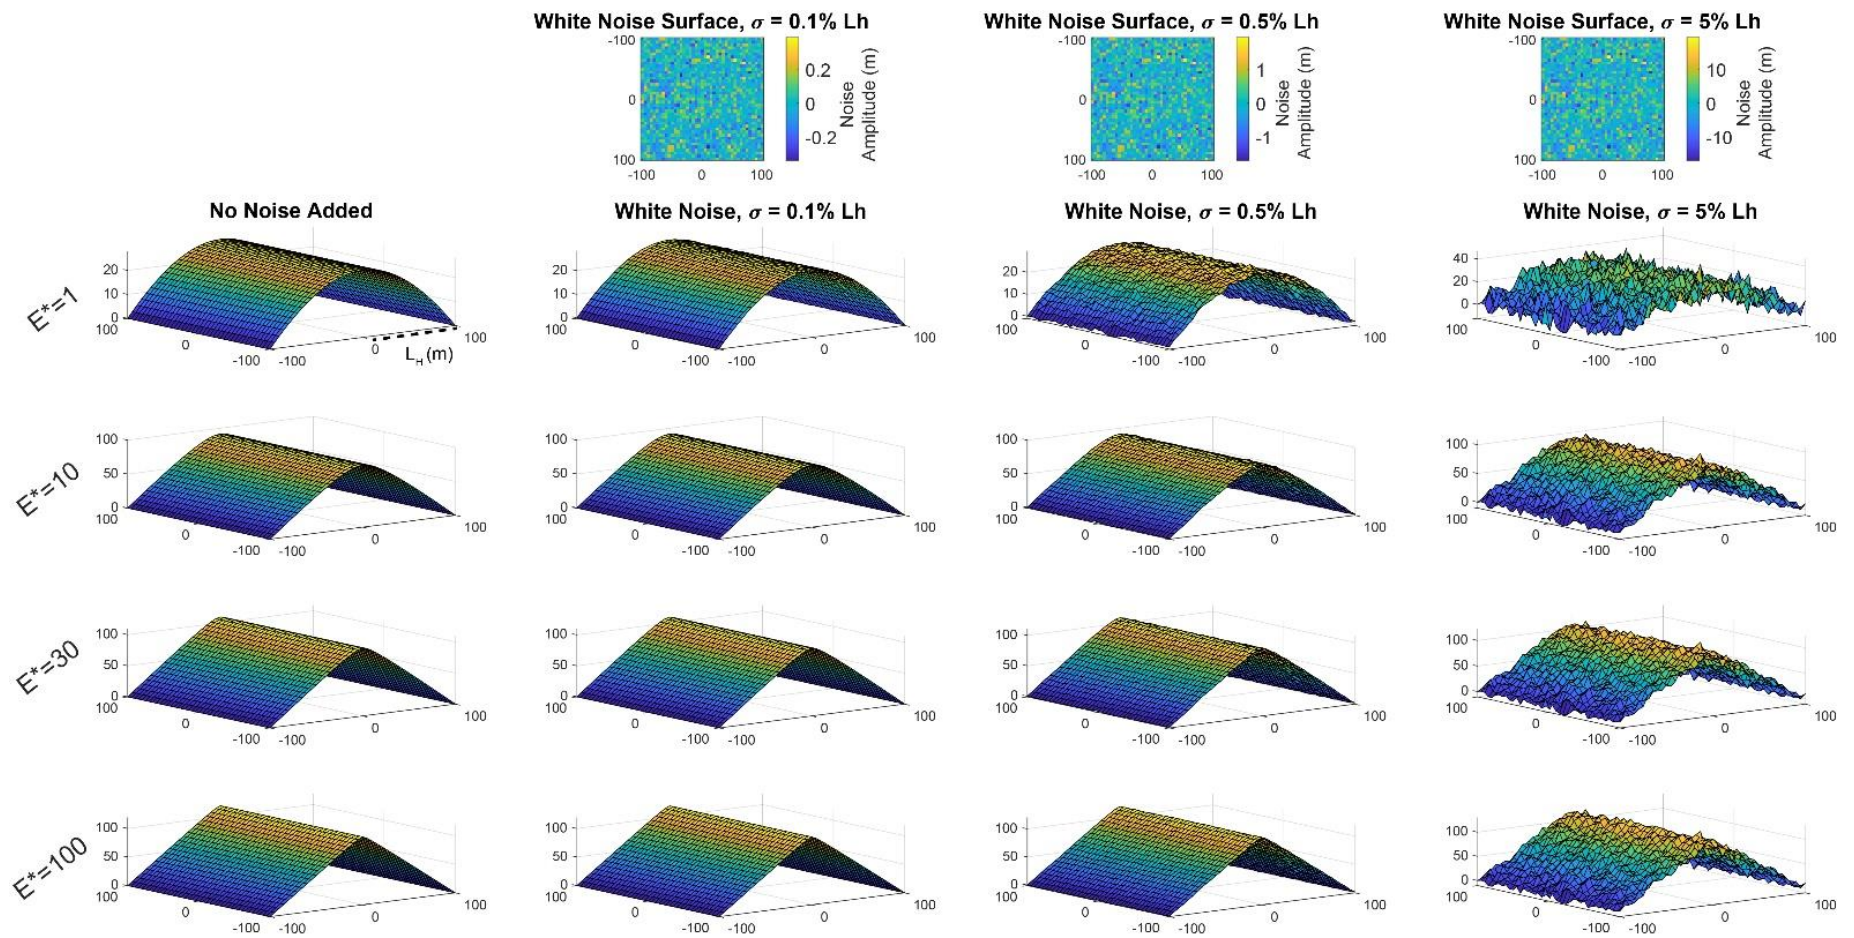

**Figure S2: Synthetic hillslopes constructed using Equation 9. Upper row shows white noise surfaces that are added to the original hillslope form (left column); yellow colors correspond with positive deviations from the hillslope (convex noise) and blue with negative deviations (concave noise). Each row of hillslopes corresponds with various dimensionless erosion rates, from  $E^*=1$ -100. Note the increased prominence of planar hillslopes as  $E^*$  increases. Noise does not vary with  $E^*$ ; thus the magnitude of noise relative to hillslope relief is more visually apparent at lower  $E^*$  (See  $\sigma=5\% L_h$  column for clear example). Note that noise exhibits little randomness at long-wavelengths, which is apparent in the pink and red noise hillslopes in Figures 7 and 8.**

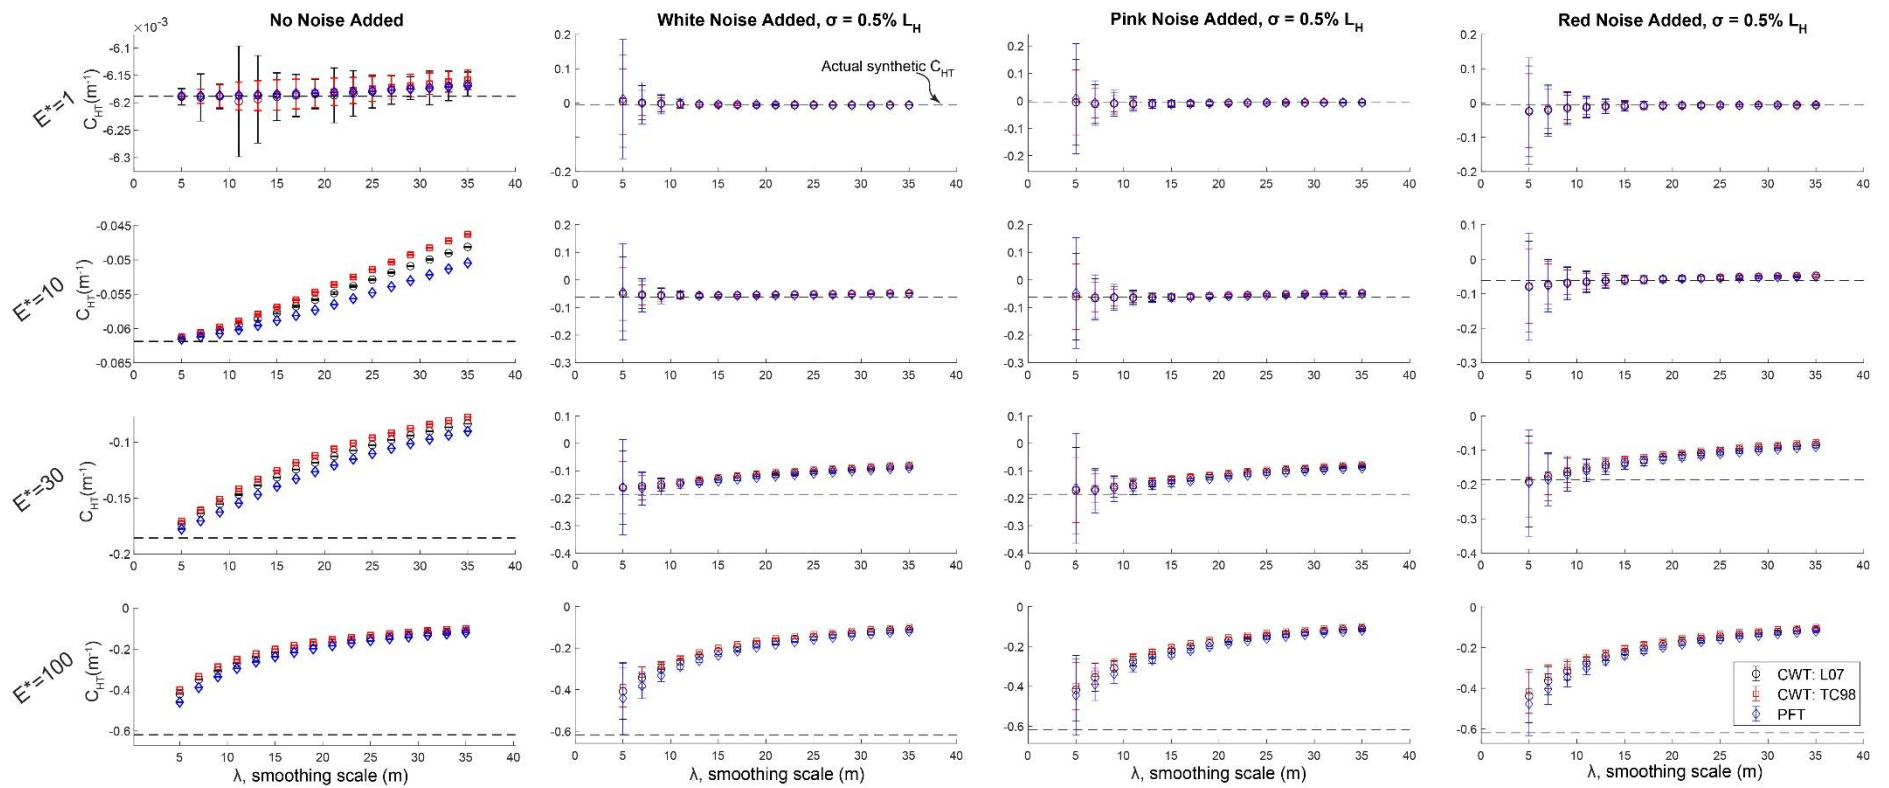

**Figure S3: Hilltop curvature when noise amplitude  $\sigma=0.5\% L_H$ .  $E^*$  increases from  $E^*=1$  in top row to  $E^*=100$  in bottom row. Left column corresponds to synthetic hillslope is no added noise, while columns 2-4 correspond with hillslopes where white, pink, and red noise have been added, respectively. Error bars are  $1\sigma$  standard deviation on the hilltop. Dashed black line is model-specified  $C_{HT}$  for the synthetic hillslope. For clarity of deviation between measured and known  $C_{HT}$ , see the ratio of the two values in Figure 9.**

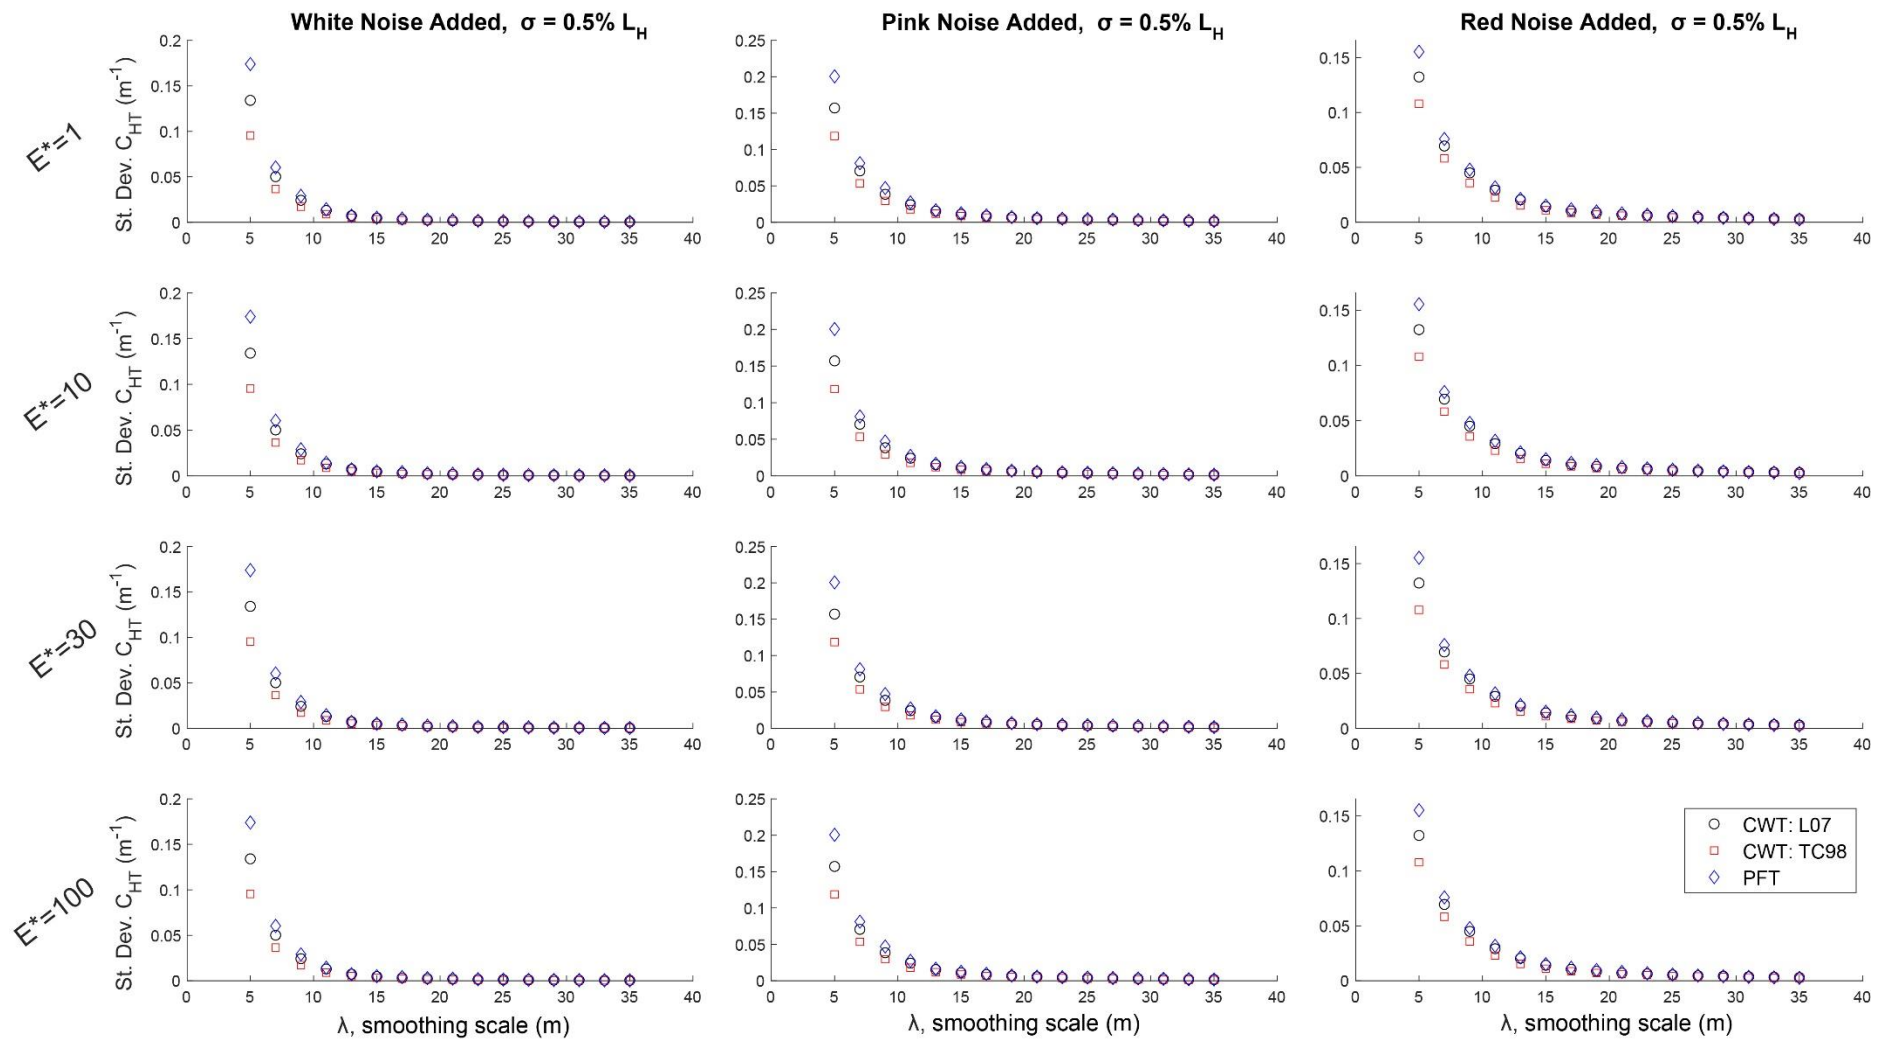

**Figure S4: Standard deviation of  $C_{HT}$  for noise amplitude  $\sigma=0.5\%L_H$ . These values correspond to the error bars in Figure S3. Note that surface noise does not vary as a function of  $E^*$ . Therefore, given the distributive property of convolutions (see main text for details), the standard deviation does not vary with  $E^*$ . Note that the standard deviation is high at small smoothing scales when the signal to noise ratio is high. As topography is smoothed, the uncertainty in  $C_{HT}$  along the hilltop decreases.**



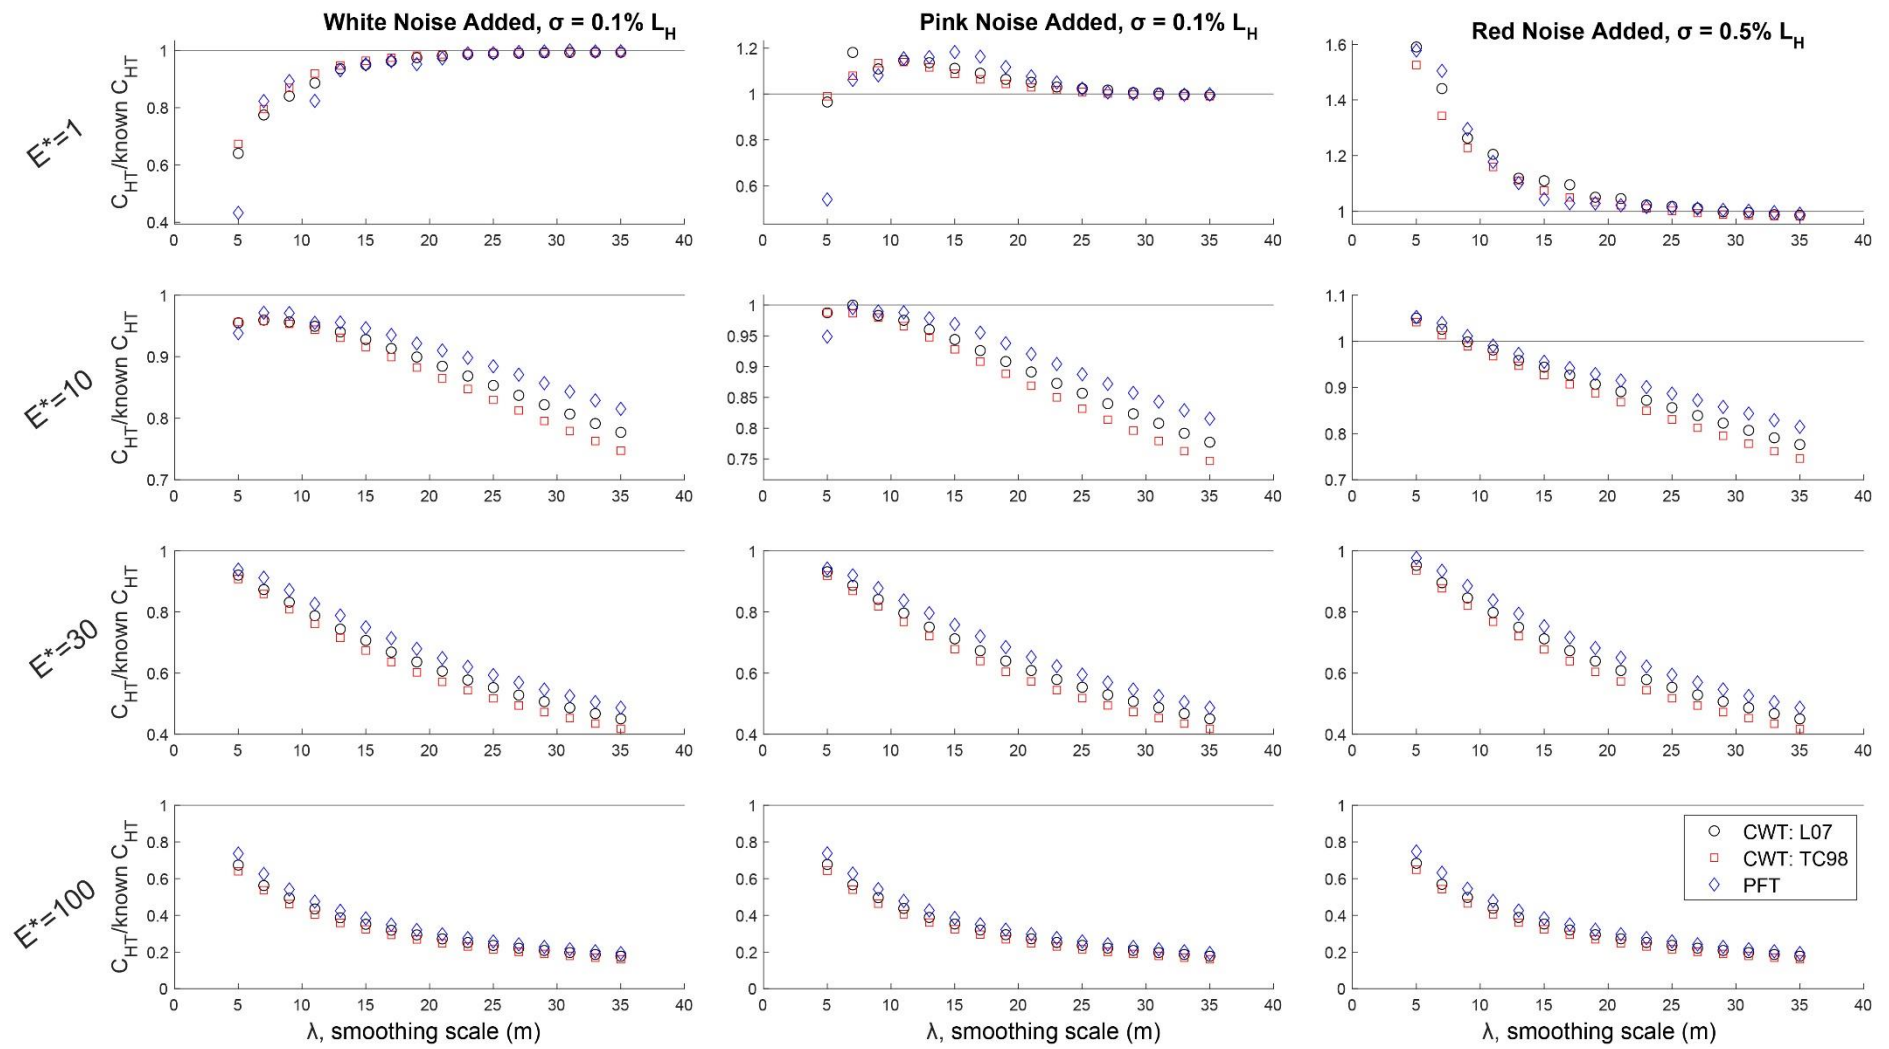

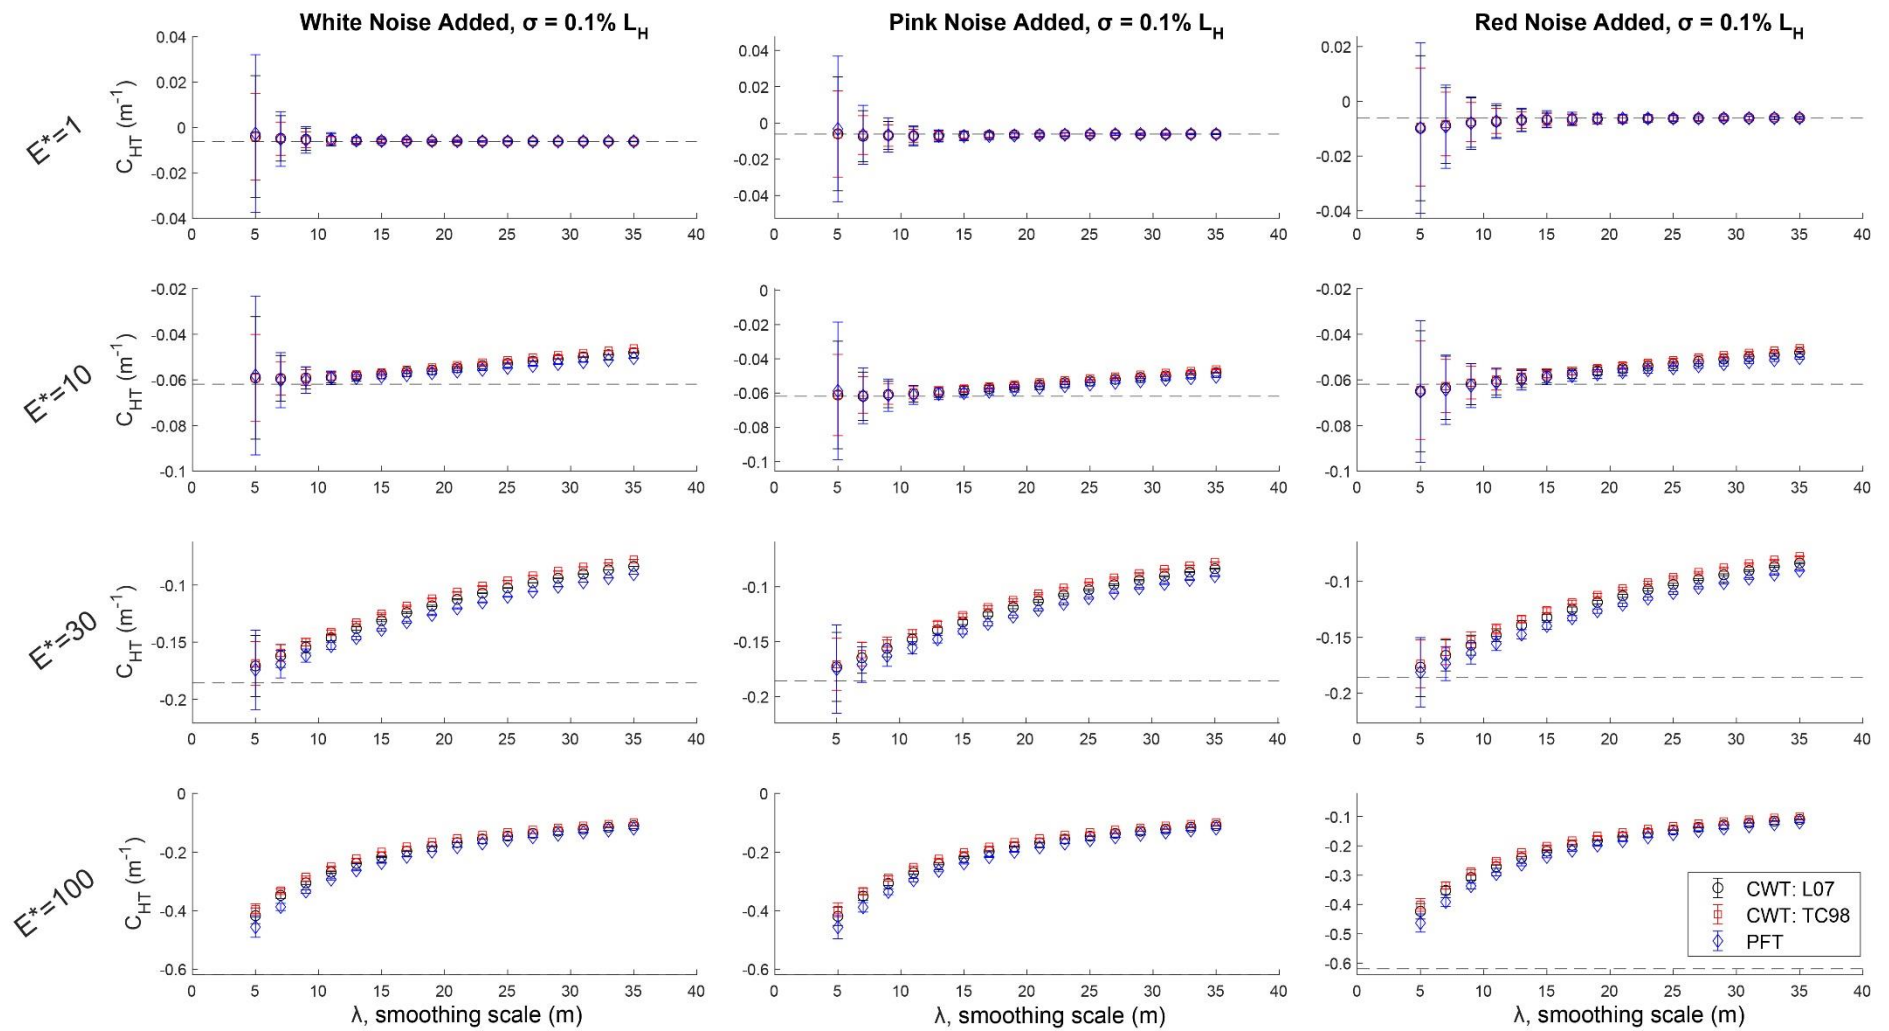

**Figure S6: Hilltop curvature when noise amplitude  $\sigma=0.1\% L_H$ .  $E^*$  increases from  $E^*=1$  in top row to  $E^*=100$  in bottom row. Left column corresponds to synthetic hillslope is no added noise, while columns 2-4 correspond with hillslopes where white, pink, and red noise have been added, respectively. Error bars are  $1\sigma$  standard deviation on the hilltop. Dashed black line is known  $C_{HT}$  from the synthetic hillslope. For clarity of deviation between measured and known  $C_{HT}$ , see the ratio of the two values in Figure S5.**

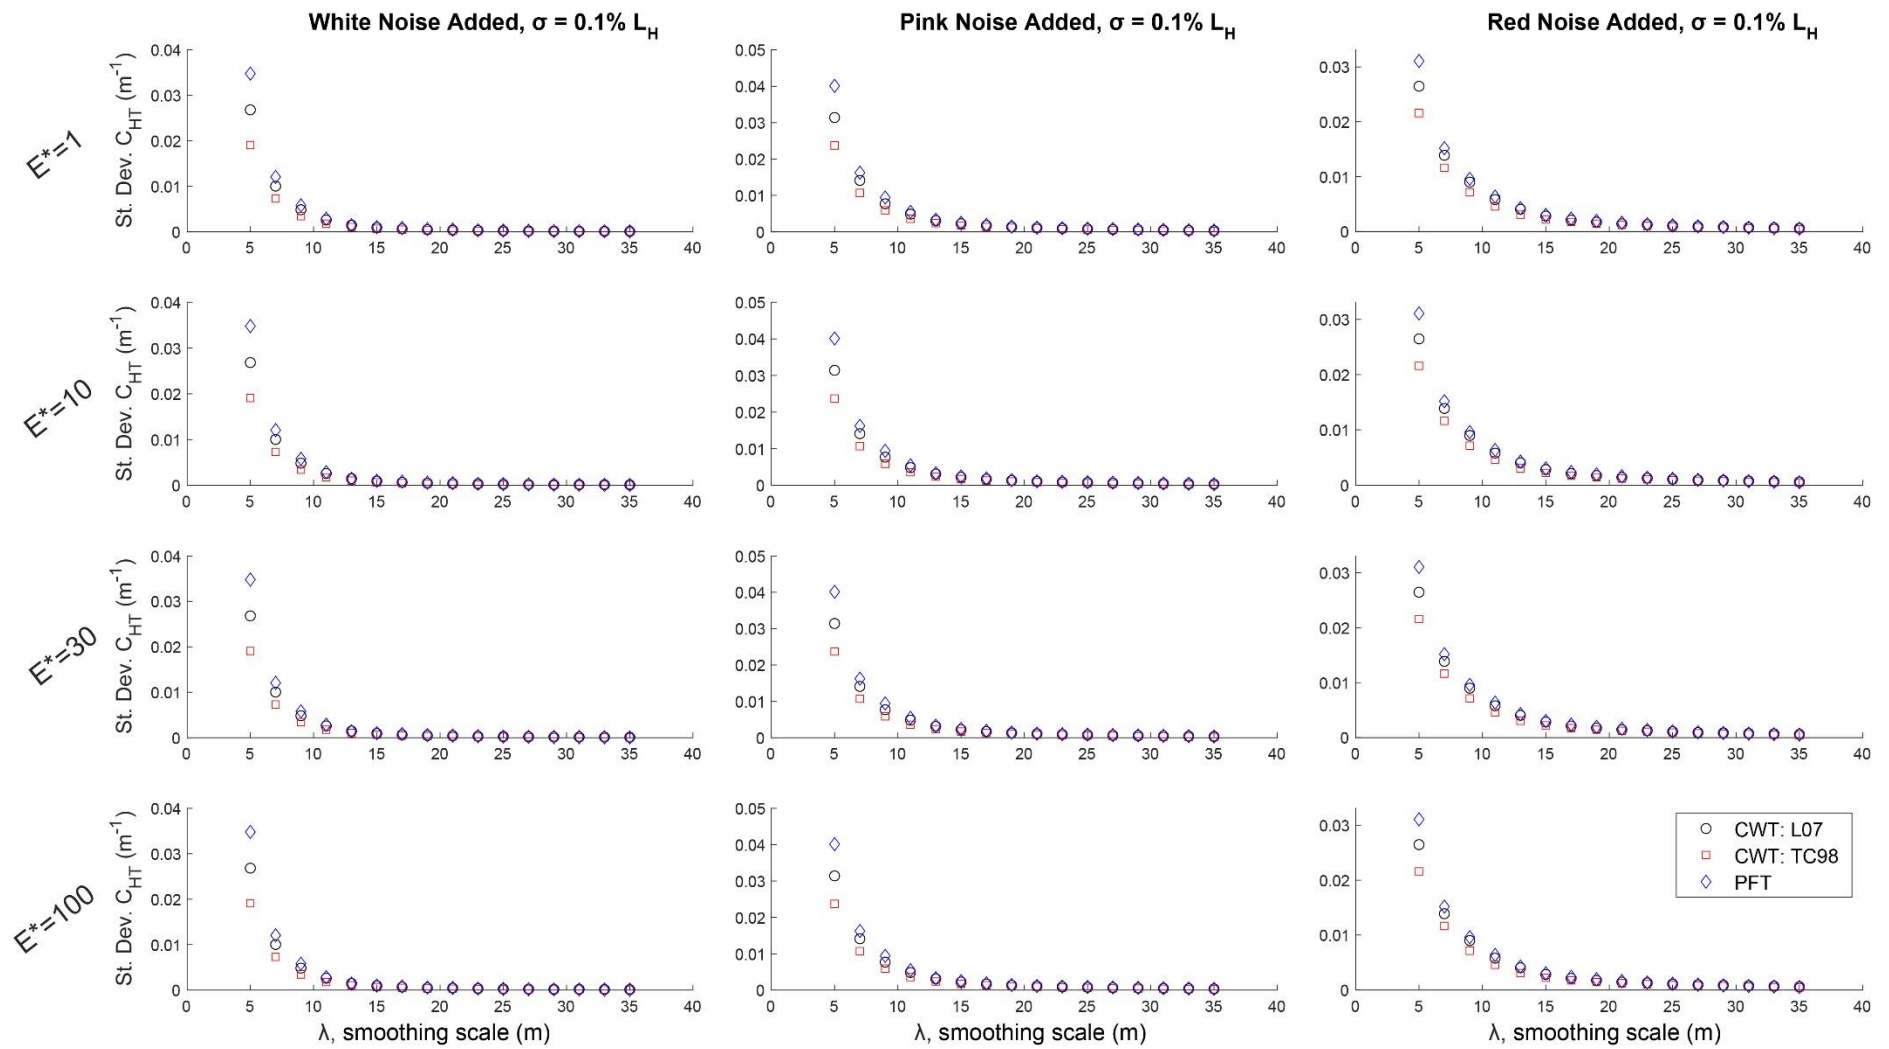

**Figure S7: Standard deviation of  $C_{HT}$  for noise amplitude  $\sigma=0.1\%L_H$ . These values correspond to the error bars in Figure S6. Note that surface noise does not vary as a function of  $E^*$ . Therefore, given the distributive property of convolutions (see main text for details), the standard deviation does not vary with  $E^*$ . Note that the standard deviation is high at small smoothing scales when the signal to noise ratio is high. As topography is smoothed, the uncertainty in  $C_{HT}$  along the hilltop decreases.**



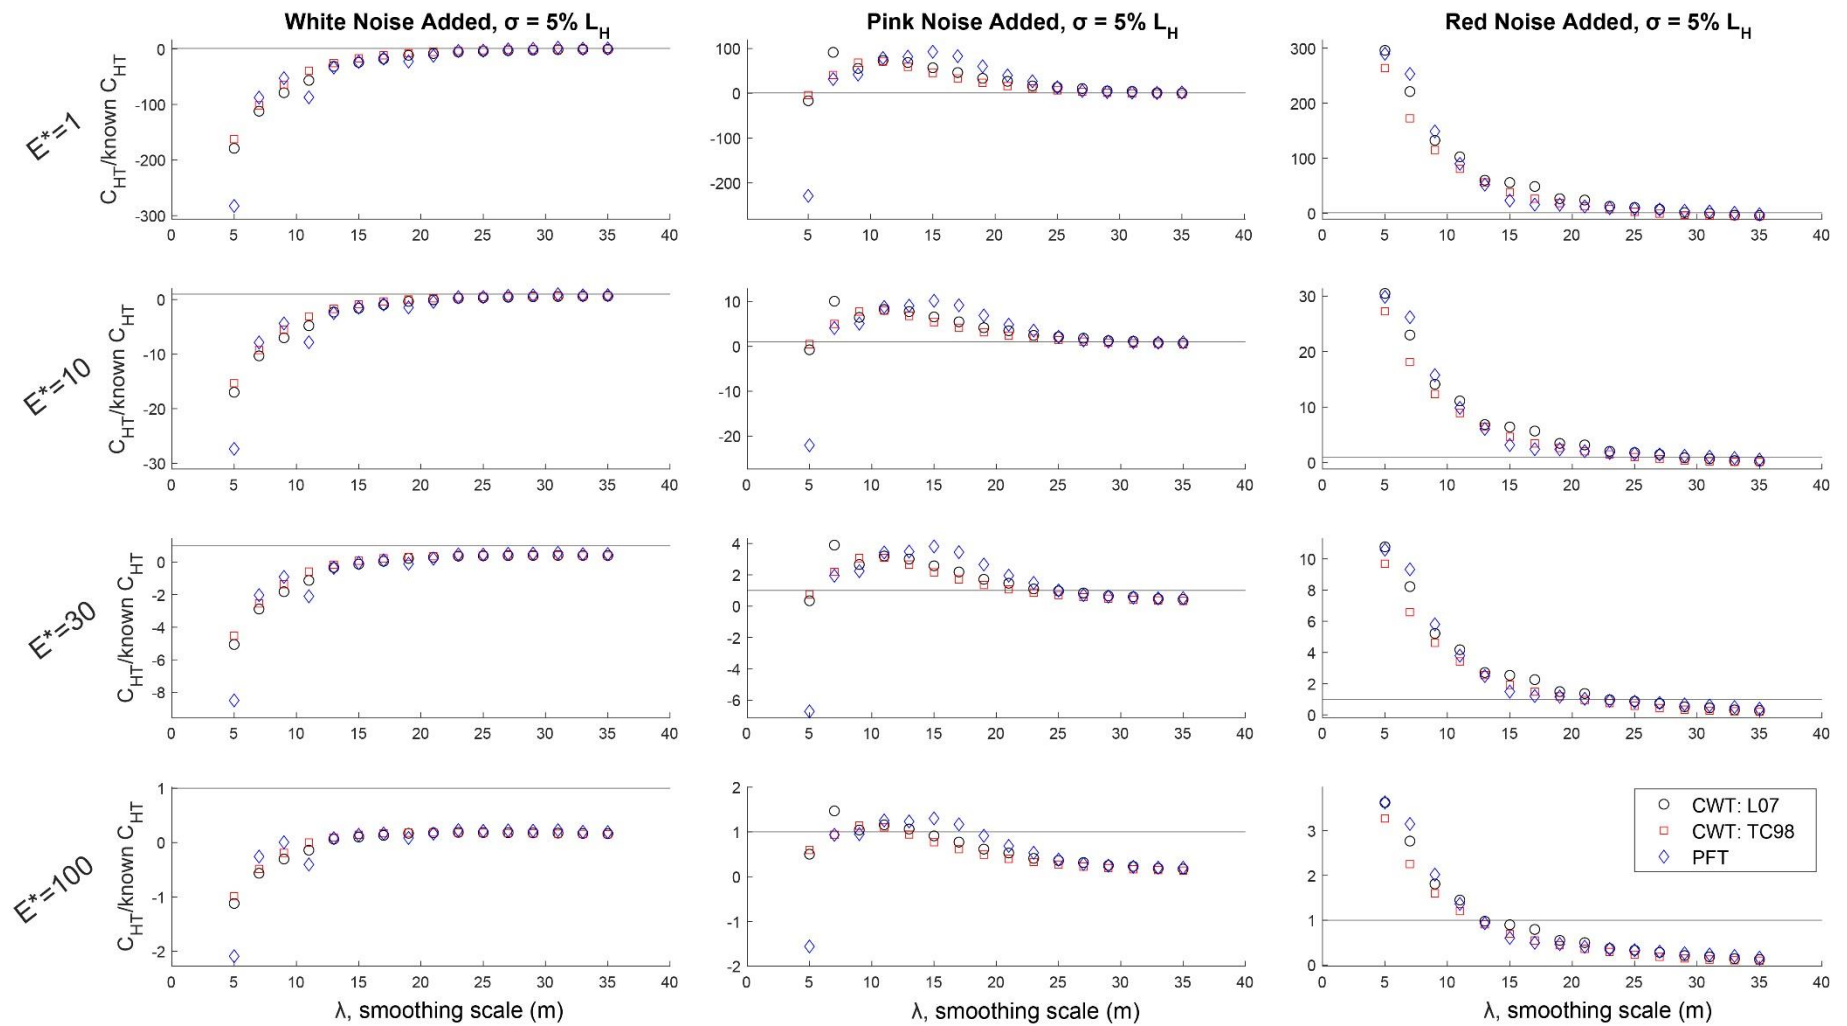

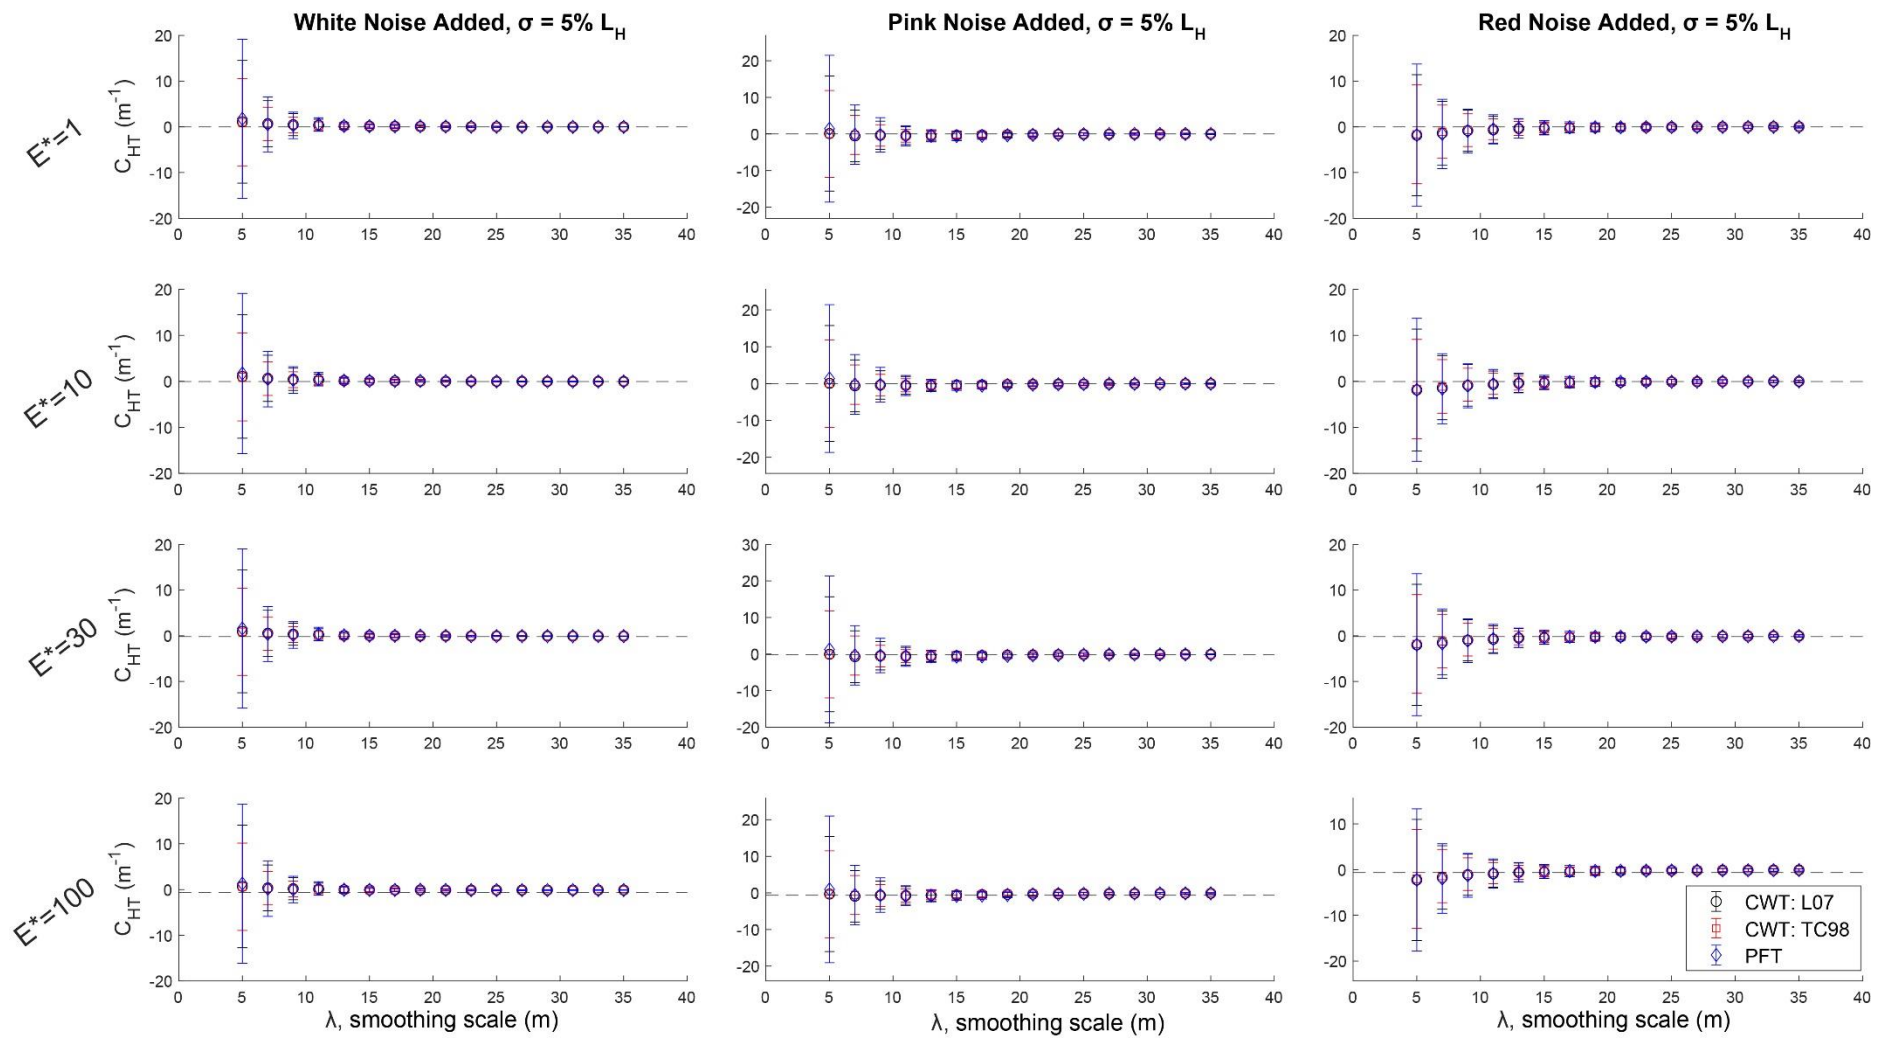

**Figure S9: Hilltop curvature when noise amplitude  $\sigma=5\% L_H$ .  $E^*$  increases from  $E^*=1$  in top row to  $E^*=100$  in bottom row. Left column corresponds to synthetic hillslope is no added noise, while columns 2-4 correspond with hillslopes where white, pink, and red noise have been added, respectively. Error bars are  $1\sigma$  standard deviation on the hilltop. Dashed black line is known  $C_{HT}$  from the synthetic hillslope. For clarity of deviation between measured and known  $C_{HT}$ , see the ratio of the two values in Figure S8.**

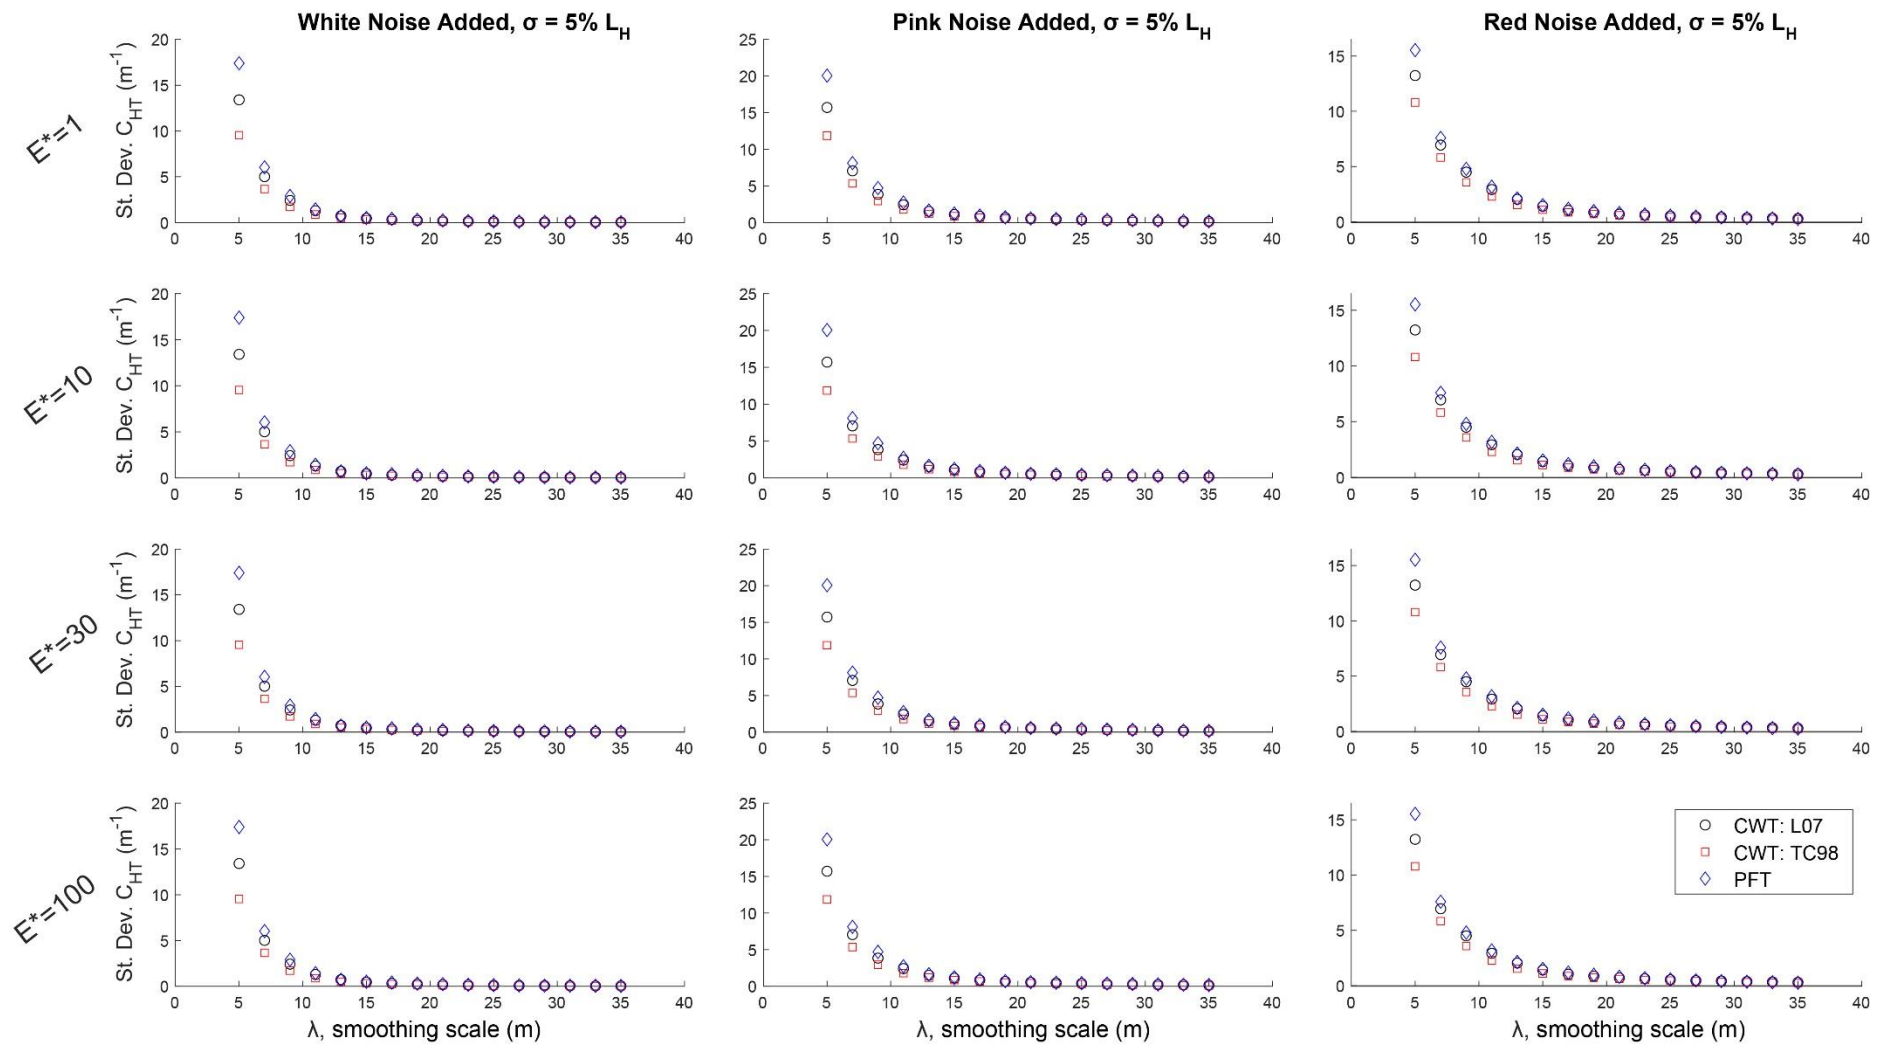

**Figure S10: Standard deviation of  $C_{HT}$  for noise amplitude  $\sigma=5\%L_H$ . These values correspond to the error bars in Figure S9. Note that surface noise does not vary as a function of  $E^*$ . Therefore, given the distributive property of convolutions (see main text for details), the standard deviation does not vary with  $E^*$ . Note that the standard deviation is high at small smoothing scales when the signal to noise ratio is high. As topography is smoothed, the uncertainty in  $C_{HT}$  along the hilltop decreases. Despite the high magnitude of the surface noise, the CWT and PFT still manage to output relatively consistent along-hilltop curvatures at larger smoothing scales.**
